# Supplementary material for: Mixing the valence control of Eu2+/Eu3+ and energy transfer construction of Eu2+/Mn2+ in the solid solution (1 − x)Ca3(PO4)2–xCa9Y(PO4)7 for multichannel photoluminescence tuning
Source: Royal Society of Chemistry journal article supplement (doi:10.1039/c9qi00827f), 2019-01-01
Supplement: c9qi00827f1.pdf [file c9qi00827f1.pdf]

## *Supporting Information*

### **Mixing valence control of $\text{Eu}^{2+}/\text{Eu}^{3+}$ and energy transfer construction of $\text{Eu}^{2+}/\text{Mn}^{2+}$ in solid solution $(1-x)\text{Ca}_3(\text{PO}_4)_2-x\text{Ca}_9\text{Y}(\text{PO}_4)_7$ for multichannel photoluminescence tuning**

Peipei Dang,<sup>a,b</sup> Dongjie Liu,<sup>a,b</sup> Guogang Li,<sup>\*,c</sup> Sisi Liang,<sup>a,b</sup> Hongzhou Lian,<sup>a</sup> Mengmeng Shang,<sup>d</sup> and Jun Lin<sup>\*,a,b,e</sup>

<sup>a</sup> *State Key Laboratory of Rare Earth Resource Utilization, Changchun Institute of Applied Chemistry, University of Science and Technology of China, Changchun 130022, P. R. China.*  
E-mail: jlin@ciac.ac.cn

<sup>b</sup> *University of Science and Technology of China, Hefei, 230026, China*

<sup>c</sup> *Engineering Research Center of Nano-Geomaterials of Ministry of Education, Faculty of Materials Science and Chemistry, China University of Geosciences, 388 Lumo Road, Wuhan 430074, P. R. China. E-mail: ggli@cug.edu.cn*

<sup>d</sup> *School of Chemistry and Chemical Engineering, Qingdao University, 308 Ningxia Road, Qingdao, 266071, P. R. China*

<sup>e</sup> *School of Applied Physics and Materials, Wuyi University, Jiangmen, Guangdong, 529020, P. R. China*

**Table S1.** Main refinement parameters of the (1-x)CPO-xCYPO:Eu<sup>2+</sup> (x = 0-1.0) samples.

| Space group: <i>R3c</i> (161) |                                                                                                            |                                |                                                              |
|-------------------------------|------------------------------------------------------------------------------------------------------------|--------------------------------|--------------------------------------------------------------|
| <i>x</i>                      | Cell parameters,<br>Å                                                                                      | Cell volume,<br>Å <sup>3</sup> | <i>R</i> <sub>wp</sub> , <i>R</i> <sub>p</sub> , %, $\chi^2$ |
| <i>x</i> = 0                  | <i>a</i> = <i>b</i> = 10.4434<br><i>c</i> = 37.3465<br>$\alpha = \beta = 90^\circ$<br>$\gamma = 120^\circ$ | 3527.46                        | 5.30, 4.08, 1.573                                            |
| <i>x</i> = 0.1                | <i>a</i> = <i>b</i> = 10.4464<br><i>c</i> = 37.3581<br>$\alpha = \beta = 90^\circ$<br>$\gamma = 120^\circ$ | 3530.62                        | 4.21, 3.18, 2.432                                            |
| <i>x</i> = 0.2                | <i>a</i> = <i>b</i> = 10.4449<br><i>c</i> = 37.3633<br>$\alpha = \beta = 90^\circ$<br>$\gamma = 120^\circ$ | 3530.07                        | 4.29, 3.17, 2.732                                            |
| <i>x</i> = 0.3                | <i>a</i> = <i>b</i> = 10.4458<br><i>c</i> = 37.3636<br>$\alpha = \beta = 90^\circ$<br>$\gamma = 120^\circ$ | 3530.77                        | 4.63, 3.50, 2.753                                            |
| <i>x</i> = 0.4                | <i>a</i> = <i>b</i> = 10.4434<br><i>c</i> = 37.3640<br>$\alpha = \beta = 90^\circ$<br>$\gamma = 120^\circ$ | 3529.16                        | 3.75, 2.79, 1.902                                            |
| <i>x</i> = 0.5                | <i>a</i> = <i>b</i> = 10.4435<br><i>c</i> = 37.3597<br>$\alpha = \beta = 90^\circ$<br>$\gamma = 120^\circ$ | 3528.79                        | 3.30, 2.54, 1.696                                            |
| <i>x</i> = 0.6                | <i>a</i> = <i>b</i> = 10.4449<br><i>c</i> = 37.3682<br>$\alpha = \beta = 90^\circ$<br>$\gamma = 120^\circ$ | 3530.57                        | 3.73, 2.83, 1.812                                            |
| <i>x</i> = 0.7                | <i>a</i> = <i>b</i> = 10.4465<br><i>c</i> = 37.3768<br>$\alpha = \beta = 90^\circ$<br>$\gamma = 120^\circ$ | 3532.45                        | 4.94, 3.81, 1.412                                            |
| <i>x</i> = 0.8                | <i>a</i> = <i>b</i> = 10.4432<br><i>c</i> = 37.3828<br>$\alpha = \beta = 90^\circ$<br>$\gamma = 120^\circ$ | 3530.82                        | 5.48, 4.24, 1.154                                            |

|           |                                                                                           |         |                   |
|-----------|-------------------------------------------------------------------------------------------|---------|-------------------|
| $x = 0.9$ | $a = b = 10.4405$<br>$c = 37.3916$<br>$\alpha = \beta = 90^\circ$<br>$\gamma = 120^\circ$ | 3529.80 | 7.34, 5.37, 2.779 |
| $x = 1.0$ | $a = b = 10.4410$<br>$c = 37.3779$<br>$\alpha = \beta = 90^\circ$<br>$\gamma = 120^\circ$ | 3528.81 | 4.81, 3.55, 2.891 |

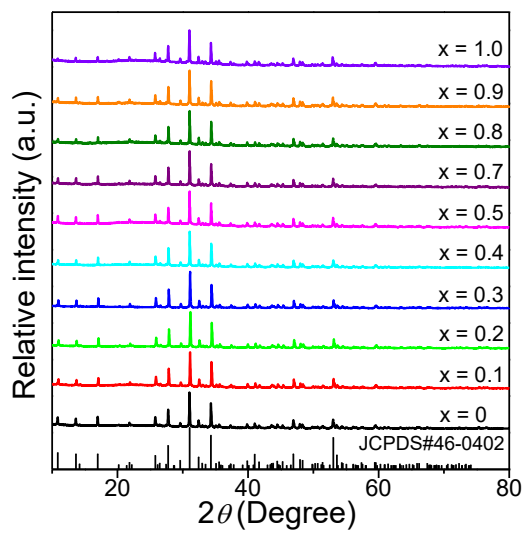

**Fig. S1.** The XRD patterns of as-prepared  $(1-x)\text{CPO}-x\text{CYPO}:\text{Eu}^{2+}$  ( $x = 0-1.0$ ) samples.

**Table S2.** The internal quantum yields (IQYs) and absorption of (1-x)CPO-xCYPO:0.03Eu<sup>2+</sup> (x = 0-1.0) samples

| Samples (x) | IQYs (%) | Abs (%) |
|-------------|----------|---------|
| 0           | 74.7     | 53.8    |
| 0.1         | 81.2     | 53.5    |
| 0.2         | 84.3     | 48.9    |
| 0.3         | 86.4     | 50.5    |
| 0.4         | 87.1     | 33.4    |
| 0.5         | 91.8     | 23.4    |
| 0.6         | 82.2     | 33.8    |
| 0.7         | 93.9     | 38.1    |
| 0.8         | 93.8     | 31.3    |
| 0.9         | 80.9     | 38.2    |
| 1.0         | 89.8     | 22.4    |

**Table S3.** The average lifetimes of  $(1-x)\text{CPO}-x\text{CYPO};y\text{Eu}^{2+},z\text{Mn}^{2+}$  samples, respectively.

| $z$  | $x = 0.2,$<br>$y = 0.01$ | $x = 0.5,$<br>$y = 0.03$ | $x = 0.7,$<br>$y = 0.05$ | $x = 0.9,$<br>$y = 0.07$ |
|------|--------------------------|--------------------------|--------------------------|--------------------------|
| 0    | 606.70 ns                | 671.53 ns                | 638.87 ns                | 892.79 ns                |
| 0.05 | 514.24 ns                |                          |                          |                          |
| 0.10 | 366.60 ns                | 486.60 ns                | 592.33 ns                | 779.98 ns                |
| 0.20 | 227.62 ns                | 357.10 ns                | 444.22 ns                | 652.40 ns                |
| 0.30 | 121.94 ns                | 295.53 ns                | 292.53 ns                | 396.25 ns                |
| 0.35 | 44.49 ns                 | 152.62 ns                | 170.63 ns                | 178.64 ns                |

**Table S4.** The long-decay ( $\tau_1$ ) and short-decay ( $\tau_2$ ) components and fraction in the total emission intensity assigned to each component of 0.5CPO-0.5CYPO:Eu<sup>2+</sup>/Eu<sup>3+</sup> sample.

| T (K) | $I_1$    | $\tau_1$ | $I_2$    | $\tau_2$ | $f_1$  | $f_2$  |
|-------|----------|----------|----------|----------|--------|--------|
| 140   | 3040.255 | 1091.55  | 4938.228 | 114.0029 | 0.8549 | 0.1450 |
| 200   | 3068.15  | 1070.71  | 5578.56  | 105.87   | 0.8476 | 0.1524 |
| 300   | 2647.03  | 984.83   | 6897.07  | 100.96   | 0.7892 | 0.2108 |
| 350   | 2439.9   | 859.43   | 9760.12  | 83.89    | 0.7192 | 0.2808 |
